# Supplementary material for: Effect of vitamin D supplementation on the incidence and prognosis of depression: An updated meta-analysis based on randomized controlled trials
Source: PubMed Central journal article supplement (PMC9376678; doi:10.3389/fpubh.2022.903547), 2022-08-01
Supplement: Table_1.pdf [file Table_1.pdf]

**Supplementary Table 1.** The characteristics of studies included in this meta-analysis (the correlation between vitamin D and the incidence of depression).

| Author, year          | Trial registration number | Mean age, year |               | BMI (kg/m <sup>2</sup> )              |                           | Baseline 25 (OH) D (nmol/L)            |                             | Terminal 25 (OH) D (nmol/L)              |                           |
|-----------------------|---------------------------|----------------|---------------|---------------------------------------|---------------------------|----------------------------------------|-----------------------------|------------------------------------------|---------------------------|
|                       |                           | Experiment     | Control       | Experiment                            | Control                   | Experiment                             | Control                     | Experiment                               | Control                   |
| Jalali-Chimeh, 2019   | IRCT201608053860N28       | 34.9           | 35.9          | NA                                    | NA                        | 38.7 (3.6)                             | 36.9 (4.1)                  | NA                                       | NA                        |
| Jorde, 2008           | NCT00243256               | 47.0;<br>50.0  | 53.0          | 33.5 (28.8–45.0);<br>33.3 (28.7–46.1) | 34.8 (28.6–<br>47.1)      | 55.2 (16.8–97.0);<br>52.2 (15.4–111.5) | 52.4 (18.5–<br>99.4)        | 112.1 (46.7–193.4);<br>87.8 (51.5–162.3) | 50.0 (20.3–99.8)          |
| Dean, 2011            | ACTRN12610000318088       | 21.45          | 22.06         | NA                                    | NA                        | 76.25 (19.63)                          | 77.23 (20.95)               | 98.0 (3.3)                               | 77.2 (2.6)                |
| Kjærgaard, 2012       | NCT00960232               | 53.4           | 53.3          | 27.5 (4.0)                            | 28.0 (4.2)                | 47.4 (15.8)                            | 47.7 (15.5)                 | 147.7 (29.2)                             | 52.5 (16.1)               |
| Bertone-Johnson, 2012 | NCT00000611               | NA             | NA            | NA                                    | NA                        | 52.0 (21.1)                            | 52.0 (21.1)                 | NA                                       | NA                        |
| Frandsen, 2014        | NCT01462058               | 44.2           | 44.4          | NA                                    | NA                        | NA                                     | NA                          | NA                                       | 46.2 (21.7)               |
| Mason, 2016           | NCT01240213               | 59.6           | 59.6          | 32.4 (5.8)                            | 32.4 (5.8)                | 53.5 (12.7)                            | 53.5 (12.7)                 | NA                                       | NA                        |
| Vaziri, 2016          | IRCT2015020310327N11      | 26.40          | 26.22         | NA                                    | NA                        | 32.1 (19.77)                           | 29.73 (16.0)                | 43.65 (25.23)                            | 30.17 (14.95)             |
| Rolf, 2017            | NCT01285401               | 38.5           | 37.6          | NA                                    | NA                        | 58.0 (38.0-82.0)                       | 53.0 (43.0-63.0)            | 226.0 (159.0-250.0)                      | 61.0 (44.0-84.0)          |
| Grung, 2017           | REK-West2013/1311         | NA             | NA            | NA                                    | NA                        | 44.0 (14.0)                            | 39.0 (16.0)                 | 62.0 (20.0)                              | 44.0 (15.0)               |
| Ghaderi, 2017         | IRCT201701035623N102      | 40.1           | 42.5          | 24.6 (4.4)                            | 25.5 (4.4)                | 34.7 (11.2)                            | 33.7 (11.2)                 | 55.0 (18.7)                              | 32.7 (14.7)               |
| Jorde, 2018           | NCT02750293               | 51.3;<br>53.0  | 52.6;<br>53.0 | 27.7 (5.0);<br>29.0 (5.3)             | 27.9 (4.7);<br>26.4 (3.5) | 32.8 (11.2);<br>28.3 (9.0)             | 35.4 (13.7);<br>29.8 (11.0) | 89.3 (18.8);<br>82.2 (27.3)              | 30.8 (9.8);<br>28.1 (8.0) |
| Mousa, 2018           | NCT02112721               | 31.5           | 32.0          | 31.7 (4.9)                            | 30.5 (4.0)                | 31.7 (13.0)                            | 35.0 (9.5)                  | 87.7 (20.7)                              | 37.9 (4.2)                |
| Raygan, 2018          | IRCT2017073033941N4       | 71.5           | 67.3          | 29.0 (6.2)                            | 28.2 (4.9)                | 36.7 (11.7)                            | 34.4 (7.5)                  | 66.3 (15.3)                              | 34.7 (8.5)                |
| Jamilian, 2018        | IRCT201704245623N114      | 26.8           | 25.1          | 27.4 (3.9)                            | 27.1 (7.0)                | 30.2 (7.8)                             | 31.7 (6.7)                  | 54.7 (15.7)                              | 31.7 (8.0)                |
| Choukri, 2018         | ACTRN12613000540718       | 24.4           | 23.9          | 25.1 (4.5)                            | 24.8 (4.9)                | 77.7 (26.1)                            | 74 (26.1)                   | 84.5 (22.7)                              | 49.2 (28.1)               |
| Krivoy, 2017          | NCT01759485               | 39.4           | 42.5          | 28.3 (3.8)                            | 28.1 (6.0)                | 37.2 (5.9)                             | 42.7 (15.5)                 | 68.6                                     | 42.3                      |

|                |                          |      |       |              |              |               |               |               |               |
|----------------|--------------------------|------|-------|--------------|--------------|---------------|---------------|---------------|---------------|
| Fazelian, 2019 | IRCT201709270<br>36451N1 | 48.5 | 46.32 | 30.21 (4.42) | 29.19 (6.41) | 55.38 (15.19) | 53.84 (16.81) | 75.61 (30.39) | 58.18 (29.51) |
|----------------|--------------------------|------|-------|--------------|--------------|---------------|---------------|---------------|---------------|

NA, no available; BMI, body mass index.
