# Supplementary material for: Effect of vitamin D supplementation on the incidence and prognosis of depression: An updated meta-analysis based on randomized controlled trials
Source: PubMed Central journal article supplement (PMC9376678; doi:10.3389/fpubh.2022.903547), 2022-08-01
Supplement: Table_2.pdf [file Table_2.pdf]

**Supplementary Table 2.** The characteristics of studies included in this meta-analysis (the correlation between vitamin D and the prognosis of depression).

| Author, year             | Trial registration number | Mean age, year  |                 | BMI (kg/m <sup>2</sup> )      |                               | Baseline 25 (OH) D (nmol/L)                 |                                 | Terminal 25 (OH) D (nmol/L)                 |                                 |
|--------------------------|---------------------------|-----------------|-----------------|-------------------------------|-------------------------------|---------------------------------------------|---------------------------------|---------------------------------------------|---------------------------------|
|                          |                           | Experiment      | Control         | Experiment                    | Control                       | Experiment                                  | Control                         | Experiment                                  | Control                         |
| Yalamanchili, 2012       | NA                        | 71.4;<br>71.8   | 71.4;<br>71.1   | 26.7 (4.3);<br>26.7 (5.4)     | 27.22 (5.0)                   | 80.0 (29.0);<br>75.75 (23.5)                | 77.25 (24.75);<br>79.25 (27.5)  | NA                                          | NA                              |
| Khoraminy,2013           | IRCT201201072<br>394N6    | 38.1            | 39.65           | 28.32 (5.43)                  | 29.00 (6.82)                  | 58.8 (10.1)                                 | 57.5 (11.0)                     | 117.1(35.4)                                 | NA                              |
| Mozaffari-Khosravi, 2013 | NA                        | 32.1;<br>32.7   | 33.0            | 26.2 (4.8);<br>26.3 (5.1);    | 25.9 (3.8)                    | 21.3;<br>23.0                               | 25.4                            | 60.2;<br>54.6                               | 28.2                            |
| Wang, 2016               | 2014058                   | NA              | NA              | 23.7(10.6)                    | 24.2(9.8)                     | 54.8 (10.2)                                 | 58 (14.5)                       | 98.8(34.1)                                  | 55.3(18.7)                      |
| Sepehrmanesh, 2016       | IRCT201412065<br>623N29   | 36.5            | 36.1            | 25.8(5.2)                     | 26.9(3.8)                     | 34 (19.7)                                   | 23.0 (15.0)                     | 85(22.7)                                    | 20.7(10)                        |
| Hansen, 2019             | NCT01390662               | 39.6            | 38.7            | NA                            | NA                            | 43.2 (24.6)                                 | 44.3 (24.1)                     | 44.3 (24.1)                                 | 52.0 (33.5)                     |
| Alavi, 2019              | IRCT201604252<br>758N1    | 68.7            | 67.0            | NA                            | NA                            | 58.6 (16.1)                                 | 55.1 (15.1)                     | 112.9 (24.7)                                | 67.3 (39.7)                     |
| Zhang, 2018              | 20150126                  | 38.3            | 40.2            | 21.2 (3.8)                    | 20.7 (4.1)                    | 57.3 (17.7)                                 | 61.3 (11.5)                     | 67.7 (20.7)                                 | 59.0 (20.3)                     |
| Amini, 2020              | IRCT201609141<br>6123N9   | 29.25;<br>26.88 | 28.92           | 26.62 (0.84);<br>27.59 (0.54) | 27.69 (0.86)                  | 39.83 (31.94,47.69);<br>36.56 (28.67,46.72) | 36.74 (28.40,45.05)             | 58.03 (45.17,70.91);<br>51.39 (39.73,63.04) | 42.90 (33.77,52.04)             |
| Libuda, 2020             | DRKS00009758              | 16.1            | 15.8            | 23.8 (5.9)                    | 22.8 (5.5)                    | 22.49 (5.12)                                | 22.23 (5.32)                    | 62.1 (15.87)                                | 27.0 (11.19)                    |
| Abiri, 2021              | IRCT200908220<br>02365N23 | 34.40;<br>34.15 | 34.30;<br>34.36 | 33.00 (1.93);<br>33.47 (1.82) | 33.18 (1.92);<br>33.40 (1.93) | 42.47 (22.49);<br>42.81 (21.43)             | 42.81 (22.10);<br>42.41 (25.12) | 99.48 (18.39);<br>98.75 (15.53)             | 38.18 (20.78);<br>38.13 (20.65) |

NA, no available; BMI, body mass index.
